# Supplementary material for: Mast Cells Interact with Endothelial Cells to Accelerate In Vitro Angiogenesis
Source: Int J Mol Sci. 2017 Dec 13;18(12):2674. doi: 10.3390/ijms18122674 (PMC5751276; doi:10.3390/ijms18122674)
Supplement: Supplementary file 1 [file ijms-18-02674-s001.pdf]

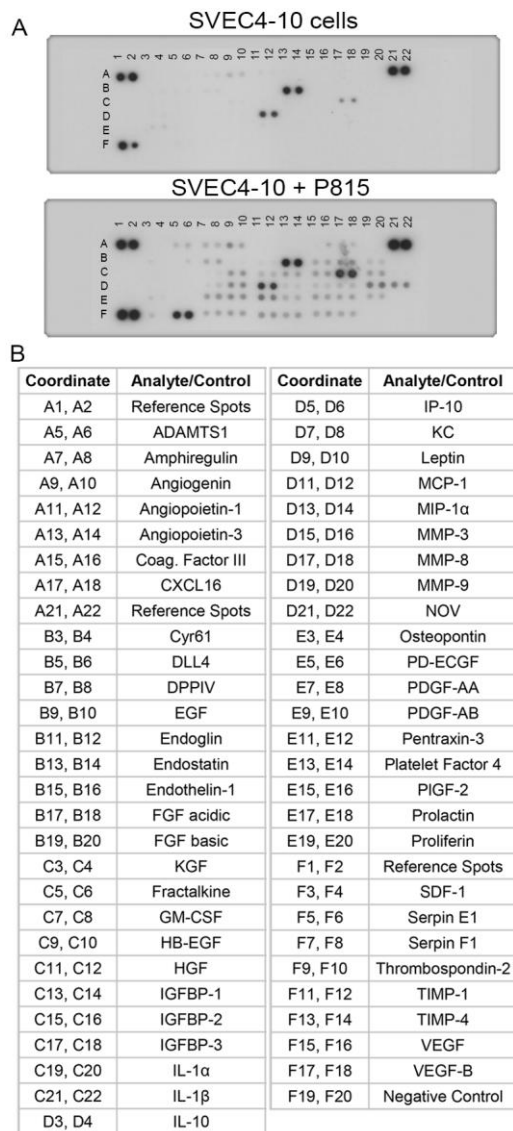

**Figure S1.** Differential release of angiogenic factors by SVEC4-10 cells in the presence or absence of mast cells. The SVEC4-10 cells were cultured for 5 hours at 37 °C on Geltrex® in the presence or absence of P815 mast cells. Culture supernatants were used to analyze the protein expression of pro- and anti-angiogenic factors using the Proteome Profiler™ Mouse Angiogenesis Array Kit. **(A)** Array membrane images are shown. **(B)** Table giving the mouse angiogenesis array coordinates with a description and location of each angiogenic factor in the membrane array.

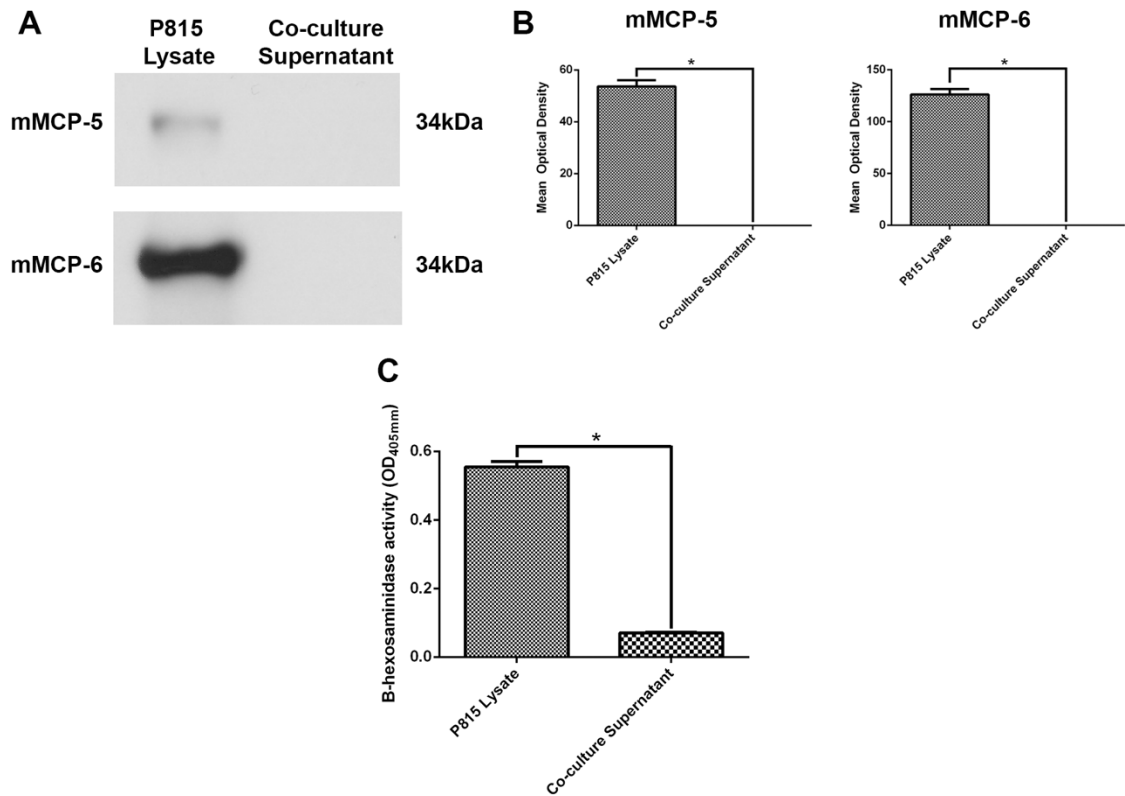

**Figure S2.** No chymase (mMCP-5) or tryptase (mMCP-6) expression or  $\beta$ -hexosaminidase activity was detected in the supernatants from the co-culture. (A) Western blots of cell lysates or supernatants from the tube formation assay from the co-cultures of SVEC4-10 cells with P815 mast cells or the lysate of P815 cells. The expression of mMPC-5 and mMCP-6 is not detectable in the supernatants from the co-cultures during tube formation assay. (B) The graphs shown the mean of optical density of the protein bands from 3 independent experiments. (C) No  $\beta$ -hexosaminidase activity was detected in the supernatants from the co-culture. The  $\beta$ -hexosaminidase activity in the co-culture supernatant is similar to that of the blank control. \* $p \leq 0.05$ .
